# Supplementary material
Source: publisher figshare collection journal article supplement (https://geolsoc.figshare.com/ndownloader/files/13481117)
Supplement: Supplementary file 1 [file 13481117]

## Sheet: Heavy Mineral Component_UAE
	%
Sample	And	Ant	Ap	Brk	Ca-Am	Cpx	Chr	Ep	Gln	Grt	Ky	Mnz	Opx	Pie	Rt	Sil	Spl	St	Ttn	Tur	Zo	Zrn
UAE_7847	0.159236	0.318471	0.159236	0	25	8.75796	1.75159	22.7707	0.159236	2.54777	0	0.636943	28.6624	0	0.318471	0	0	0	0.636943	3.18471	1.27389	3.66242	100
UAE_7849	0.15949	0.15949	0.637959	0	53.429	3.0303	0.478469	19.4577	0.15949	8.29346	0.637959	0.318979	1.11643	0	1.27592	0	0	0	4.6252	1.43541	2.39234	2.39234	100
UAE_7850	0	0.161031	0.805153	0	46.8599	1.93237	1.44928	26.087	0	7.40741	0.322061	0.966184	0.322061	0	2.0934	0	0	0.483092	4.34783	2.0934	1.44928	3.22061	100
UAE_7851	0	0.12987	0.779221	0	24.026	6.88312	0.779221	21.039	0.779221	10.1299	0.12987	0.519481	19.0909	0	1.2987	0	0	0	3.24675	2.72727	1.2987	7.14286	100
UAE_7864	0	0	1.44928	0	9.66184	4.34783	0.483092	46.2158	0	10.1449	0.161031	0.483092	1.44928	0	5.47504	0	0	0.966184	2.57649	2.0934	1.12721	13.3655	100
UAE_7867	0	0	0	0	29.376	6.84932	0	27.8539	0	17.8082	0	1.06545	2.1309	0	1.06545	0	0	0.456621	1.82648	1.67428	1.82648	8.06697	100
UAE_7870	0	0	0.323625	0	33.0097	4.20712	0	37.055	0.161812	9.38511	0.323625	0.323625	2.26537	0	0.970874	0	0.161812	0.647249	1.45631	1.77994	0	7.9288	100
UAE_7871	0	0	0.490196	0.326797	19.9346	5.71895	1.14379	47.8758	0.163399	8.00654	0	0	2.12418	0	1.14379	0	0	0.163399	4.08497	3.43137	1.30719	4.08497	100
UAE_7874	0	0	0.476948	0	23.8474	7.79014	0.158983	35.7711	0.158983	11.2878	0	0.317965	5.08744	0	0.953895	0	0	0.317965	2.22576	1.43084	2.06677	8.10811	100
UAE_7878	0	0.302572	3.78215	0.151286	26.7776	9.37973	0.605144	32.9803	0.75643	13.0106	0	0	2.57186	0	1.36157	0.453858	0	0.151286	0.302572	1.51286	2.118	3.78215	100
UAE_7879	0	0	1.53322	0	33.0494	5.28109	0.170358	34.753	0	13.799	0	0	1.02215	0	1.36286	0	0	0	1.02215	1.53322	0.681431	5.79216	100
UAE_7880	0	0.162602	0.487805	0	0.813008	1.78862	0.813008	48.4553	0.650407	20.6504	0	0.162602	0.813008	0	3.08943	0	0	0.650407	3.57724	2.92683	0.813008	14.1463	100
UAE_7975	0	0	0.141044	0	53.0324	1.69252	0.564175	29.4781	0	5.78279	0	0.423131	0.282087	0	0.282087	0	0.141044	0.282087	0.846262	2.2567	0.987306	3.80818	100
UAE_7976	0	0	0	0	39.5833	1.6369	1.93452	42.1131	0	6.54762	0	0.446429	0.446429	0	1.19048	0	0	0.14881	1.33929	0.595238	0.892857	3.125	100
UAE_7981	0	0	0	0	21.6327	2.9932	0	27.483	0.136054	14.966	0	1.36054	18.7755	0	1.36054	0	0.136054	0.952381	1.08844	2.17687	0.680272	6.2585	100
UAE_7982	0	0	0.328407	0	50.0821	3.94089	0.164204	25.4516	0	7.22496	0	0.492611	1.14943	0	1.97044	0	0	0.328407	2.62726	2.79146	0.656814	2.79146	100
UAE_7986	0.163666	0	0.163666	0	1.63666	1.30933	1.473	43.3715	0.327332	21.2766	0	1.473	0.163666	0.163666	4.90998	0.163666	0	2.61866	2.45499	2.78232	0.490998	15.0573	100
UAE_8503	0	0	0.323102	0	54.1195	1.77706	0	24.5557	0	9.36995	0	0.484653	0	0	0.484653	0.161551	0	0.646204	1.45396	0.323102	0	6.30048	100
UAE_8504	0	0	0.323625	0	40.7767	0.647249	0.809061	32.2006	0.161812	11.3269	0.161812	0	0	0	1.45631	0	0	0.323625	1.77994	1.2945	0.161812	8.57605	100
UAE_8507	0	0	0.630915	0	21.1356	0.315457	0.946372	42.1136	0.315457	18.9274	0	0	0	0	2.52366	0	0	0.946372	1.26183	2.05047	0.630915	8.20189	100
UAE_7865	0	0	0.302572	0	33.888	8.77458	0.151286	34.0393	0.453858	9.6823	0	0.75643	1.66415	0	0.302572	0	0	0.151286	2.72315	2.118	0.75643	4.23601	100
UAE_7868	0.308166	0	0.154083	0	38.2126	3.85208	0	27.735	0	11.7103	0	0.308166	2.92758	0	0.924499	0	0.154083	0	4.46841	1.69492	0.924499	6.62558	100
UAE_8045	0	0.396301	0	0	32.4967	3.03831	2.11361	37.9128	0	12.8137	0	0.264201	0	0	1.4531	0.1321	0	0.264201	2.50991	0.660502	0.264201	5.68032	100
UAE_8014	0	0	0.479233	0	46.3259	3.67412	0.159744	32.1086	0.159744	10.3834	0.159744	0.638978	0.159744	0	0.638978	0.159744	0	0.319489	1.27796	1.91693	0.479233	0.958466	100
UAE_8015	0	0	2.68908	0	40.1681	2.85714	0.168067	32.437	0	9.57983	0.168067	1.17647	3.86555	0	0.504202	0	0	0.672269	0.840336	2.18487	0	2.68908	100
UAE_8018	0	0	0.584795	0	46.9298	4.82456	1.31579	32.4561	0	5.84795	0	0.146199	0.292398	0	0.877193	0	0	0.584795	1.02339	2.63158	0.292398	2.19298	100
UAE_8019	0.162866	0	0.488599	0	47.557	6.67752	0.488599	27.5244	0.325733	10.5863	0	0.325733	0.488599	0	0.325733	0	0	0.814332	1.14007	0.814332	0.488599	1.79153	100
UAE_8031	0	0.335008	2.34506	0	5.69514	0.670017	4.69012	43.8861	0.167504	25.7956	0	0.167504	1.67504	0	3.18258	0	0	0.167504	1.17253	0.670017	0.670017	8.71022	100
UAE_8033	0	0	0	0	9.1653	1.14566	0	58.2651	0	14.73	0	0.654664	0.163666	0	1.63666	0	0	0.981997	0.981997	0.327332	0.490998	11.4566	100
UAE_8029	0.46729	0	0	0	56.3863	2.18069	0.778816	28.3489	0.155763	5.919	0	0.311526	0.155763	0	0.46729	0	0	0.46729	0.934579	0.46729	0.778816	2.18069	100
UAE_8040	0	0	0.801282	0	39.5833	8.33333	0.961538	26.6026	0	12.0192	0.160256	0.480769	0.160256	0	2.24359	0	0	0.480769	1.12179	2.88462	0.160256	4.00641	100
UAE_8041	0	0.27894	1.25523	0	40.0279	4.74198	0.83682	31.7992	0	11.9944	0.13947	0.13947	0.13947	0	0.69735	0	0	0	0.83682	1.81311	0.69735	4.60251	100
UAE_7858	0	0.167504	2.84757	0	16.2479	2.51256	1.34003	46.9012	0	13.4003	0.502513	0.167504	1.50754	0.167504	2.01005	0	0	0.167504	4.1876	2.01005	1.84255	4.0201	100
UAE_7859	0	0.167504	3.35008	0	1.17253	4.35511	1.50754	50.7538	0.502513	17.7554	0	0.167504	2.51256	0	2.68007	0	0.167504	1.00503	4.85762	1.67504	0.837521	6.53266	100
UAE_7860	0	0.30349	2.27618	0	1.21396	4.40061	1.97269	33.8392	0.30349	35.3566	0	0.91047	1.36571	0.151745	2.88316	0	0	0.455235	3.49014	1.36571	1.82094	7.89074	100
UAE_7861	0	0	0.464396	0	47.5232	3.56037	0	29.1022	0	8.20433	0	1.39319	0.928793	0	0.619195	0	0	0.464396	1.08359	0.464396	0.619195	5.57276	100
UAE_7862	0	0	1.14007	0	41.2052	2.76873	0	34.202	0.162866	6.84039	0.162866	0.651466	0.977199	0	1.14007	0.162866	0	0	4.07166	1.14007	0.977199	4.39739	100
UAE_7863	0	0	0.49505	0	51.3201	0.990099	0	35.3135	0	2.80528	0	0.660066	1.9802	0	0.165017	0	0	0.165017	1.48515	0.165017	1.81518	2.64026	100
UAE_8030	0.509338	0.169779	0.339559	0	41.7657	1.01868	0.169779	28.5229	0.169779	9.67742	0	0.339559	4.75382	0	0.339559	0	0.169779	0.339559	1.52801	0.509338	0	9.67742	100
UAE_8032	0	0.168634	1.34907	0	21.5852	2.86678	0.84317	42.6644	0.337268	16.8634	0	0	0.505902	0.168634	1.68634	0	0	0.337268	1.0118	2.02361	1.18044	6.40809	100
UAE_8044	0	1.28023	0.853485	0	33.2859	3.84068	2.7027	32.2902	0	11.2376	0	0.142248	0.426743	0	4.26743	0	0	0	1.42248	0.711238	1.42248	6.11664	100
UAE_8501	0	0	0.796178	0	23.0892	10.0318	1.91083	30.5732	0.159236	7.16561	0	1.27389	0.955414	1.11465	1.11465	0	0	0.477707	7.80255	2.2293	1.43312	9.87261	100
UAE_8502	0	0	0.156495	0	59.6244	1.09546	0.312989	29.734	0.156495	4.38185	0.156495	0	0.312989	0	0.469484	0	0	0.156495	1.72144	0.156495	0	1.56495	100
UAE_8505	0.163132	0	0	0	17.1289	4.89396	2.61011	33.6052	0	11.4192	0.163132	0	0.326264	0	2.61011	0	0	1.46819	4.89396	1.63132	1.79445	17.292	100
UAE_8506	0.304878	0.152439	0.152439	0	1.21951	0.914634	2.43902	32.9268	0.152439	23.3232	0	0	0	0	5.64024	0	0	1.67683	3.20122	0.914634	0.457317	26.5244	100
UAE_7852	0	0.318979	2.55183	0	5.74163	14.8325	3.66826	35.2472	0	20.4147	0.478469	0.797448	3.50877	0	1.75439	0.318979	0	0.797448	1.11643	4.6252	0.637959	3.18979	100
UAE_8022	0.502513	0	2.51256	0	20.4355	7.8727	7.20268	36.1809	0	15.5779	0.167504	0.335008	1.00503	0	0.670017	0	0	1.17253	0.670017	3.35008	0.837521	1.50754	100
UAE_8025	0.326797	0.163399	3.75817	0	17.3203	10.7843	4.90196	44.1176	0.326797	12.2549	0	0	0.490196	0	0.816993	0	0	0.490196	0.326797	2.28758	1.14379	0.490196	100
UAE_8508	0.325203	0.325203	5.52846	0	12.3577	3.73984	10.5691	27.4797	0	28.6179	0.162602	0	3.25203	0	1.62602	0	0	0.162602	0.162602	1.78862	0	3.90244	100
UAE_8509	0	0	0.89153	0	13.5215	4.60624	12.4814	34.4725	0.148588	24.5171	0	0	0	0	2.37741	0	0.148588	1.63447	0.89153	1.78306	0.594354	1.93165	100
UAE_7828	0	0.491803	0.655738	0	12.9508	14.7541	2.13115	27.377	0	14.2623	0.163934	0	6.39344	0	1.80328	0.655738	0	1.63934	3.93443	5.90164	2.13115	4.7541	100
UAE_7829	0	0.501672	1.00334	0	15.7191	16.2207	3.17726	39.4649	0.167224	6.35452	0.668896	0.334448	3.51171	0	0.167224	0	0	0.334448	2.84281	4.34783	2.34114	2.84281	100
UAE_7830	0	0.324675	1.13636	0	16.3961	13.1494	2.43506	36.8506	0.162338	5.03247	0.162338	0.487013	3.8961	0	1.2987	0	0	0.649351	5.19481	8.27922	2.11039	2.43506	100
UAE_7831	0	0.169779	1.18846	0	12.3939	16.8081	4.9236	38.8795	0	10.017	0	0.169779	6.45161	0	0.848896	0	0	0	2.03735	3.56537	1.35823	1.18846	100
UAE_7832	0.323102	1.13086	0.969305	0	14.5396	25.3635	3.23102	27.1405	0.323102	10.8239	0.161551	0.323102	2.26171	0	1.45396	0	0	0.323102	2.10016	6.30048	1.93861	1.29241	100
UAE_7833	0	0	0.66778	0	12.3539	11.1853	2.00334	34.7245	0	12.187	0.33389	1.66945	4.34057	0.166945	1.33556	0	0	1.5025	5.17529	4.00668	1.83639	6.51085	100
UAE_7834	0	0.831947	1.33111	0	16.3062	13.8103	5.15807	32.6123	0.166389	11.1481	0.332779	0.166389	5.82363	0.166389	0.499168	0.499168	0	1.83028	1.4975	6.48918	0.166389	1.16473	100
UAE_7835	0	0	0.513699	0	24.1438	15.0685	1.19863	28.5959	0	11.9863	0.171233	0.342466	7.36301	0	0.513699	0	0	0.342466	0.684932	6.33562	2.22603	0.513699	100
UAE_7836	0	0	0.654664	0	27.9869	7.85597	3.92799	37.8069	0	5.89198	0	0.327332	4.58265	0	1.473	0	0	0.818331	1.14566	4.58265	0.981997	1.96399	100
UAE_7838	0.326797	0.326797	0.980392	0	13.2353	9.80392	7.51634	32.1895	0	17.1569	0.653595	0	2.45098	0	1.30719	0.326797	0.163399	0.653595	1.30719	6.04575	1.96078	3.59477	100
UAE_7839	0.487013	0.324675	0.162338	0	17.0455	10.5519	6.16883	36.2013	0.162338	13.961	0.162338	0.324675	4.70779	0	0.649351	0	0	0.324675	1.2987	4.38312	1.2987	1.78571	100
UAE_7840	0	0.158983	0.158983	0	16.2162	11.9237	2.06677	34.6582	0.158983	11.1288	0	0.953895	8.10811	0	0.317965	0	0	1.27186	3.02067	4.61049	1.58983	3.6566	100
UAE_7841	0	0.476948	0.317965	0	17.4881	13.5135	1.90779	31.0016	0	12.8776	0.158983	0.953895	6.99523	0.158983	0.317965	0	0	0.317965	3.17965	4.61049	1.11288	4.61049	100
UAE_7842	0	0	0.158983	0	20.8267	10.9698	0.476948	31.7965	0	13.0366	1.58983	0.158983	7.94913	0	0.158983	0	0	0.794913	2.38474	5.40541	1.11288	3.17965	100
UAE_7881	0	0	0.157729	0	10.5678	11.3565	4.4164	27.4448	0.157729	30.2839	0	0	1.73502	0	2.05047	0	0	0.315457	1.1041	3.62776	0.157729	6.62461	100
UAE_7882	0.163934	0	0.327869	0	8.36066	11.3115	4.2623	43.4426	0.327869	16.8852	0	0	1.80328	0	1.80328	0	0	0.819672	0.819672	4.42623	0.163934	5.08197	100
UAE_7884	0.319489	0	0.479233	0	10.3834	5.91054	2.39617	44.0895	0	19.6486	0	0.798722	2.07668	0	0.798722	0	0	0.479233	2.8754	3.19489	0.958466	5.59105	100
UAE_7885	0.328407	0	1.80624	0	12.4795	9.0312	5.91133	35.6322	0.985222	19.7044	0	0.985222	2.62726	0	1.14943	0	0.164204	0.656814	1.64204	1.14943	0.821018	4.92611	100
UAE_7888	0	0.162602	0.487805	0	16.9106	8.45528	3.57724	45.6911	0.325203	12.6829	0.162602	0.162602	1.46341	0	1.62602	0	0	0.162602	0.97561	3.08943	0	4.06504	100
UAE_7889	0	0	0.649351	0	25.6494	1.46104	0.974026	44.6429	0	7.95455	0	0.649351	2.27273	0	2.75974	0	0	0.324675	1.13636	0.974026	0.487013	10.0649	100
UAE_7891	0	0	1.67224	0	31.1037	5.51839	2.84281	39.6321	0.501672	10.3679	0.334448	0.167224	0.668896	0	0.668896	0	0	0.334448	1.50502	1.50502	1.50502	1.67224	100
UAE_7893	0	0.167785	1.00671	0	35.5705	2.85235	1.84564	34.396	0	12.9195	0.33557	0.33557	0.671141	0	0.671141	0	0	0.167785	0.671141	4.02685	0.503356	3.85906	100
UAE_7894	0	0	0.327332	0	36.6612	2.12766	0.818331	33.8789	0	17.0213	0	0	0.327332	0	0.163666	0	0	0	0.654664	3.10966	0.327332	4.58265	100
UAE_7895	0.156986	0	1.0989	0	12.4019	5.18053	3.2967	34.2229	0	24.8038	0	0.470958	1.25589	0	3.13972	0	0	0	1.56986	3.92465	0.313972	8.16327	100
UAE_7896	0.165289	0	0.495868	0	27.9339	5.12397	1.32231	40	0.495868	12.562	0	0.495868	0.661157	0.165289	0.495868	0	0	1.15702	1.32231	4.6281	0.330579	2.64463	100
UAE_7897	0	0	0.162602	0	26.8293	4.39024	2.11382	34.7967	0.162602	18.374	0.325203	0.162602	0.325203	0	0.162602	0	0	0.487805	1.95122	4.55285	0.487805	4.71545	100
UAE_7900	0.161551	0	0.484653	0	35.7027	2.10016	1.13086	33.6026	0	15.0242	0	0.161551	0.323102	0	0.323102	0	0	0.807754	1.45396	3.39257	0.161551	5.16963	100
UAE_7938	0	0	0.332779	0	9.65058	3.49418	7.48752	26.9551	0	20.4659	0	0.332779	18.9684	0	1.4975	0	0	0.499168	0.499168	2.99501	0.166389	6.65557	100
UAE_7939	0.162866	0	0.162866	0.162866	19.8697	7.49186	2.11726	34.0391	0.488599	10.4235	0	0	14.9837	0	0.977199	0	0.162866	1.30293	1.4658	3.09446	0	3.09446	100
UAE_7940	0	0	0	0	22.3154	10.4027	2.18121	34.396	0.167785	14.094	0	0.503356	7.88591	0	1.34228	0	0	0	0	4.86577	0.33557	1.51007	100
UAE_8500	0	0	0	0	29.9342	6.57895	1.48026	32.4013	0	16.7763	0	0.164474	0.164474	0	1.15132	0	0	0.822368	2.13816	0.986842	0.328947	7.07237	100
UAE_7926	0.16835	0	0.841751	0	25.7576	10.6061	3.87205	47.138	0.3367	5.72391	0	0	1.6835	0	0.16835	0	0	0.16835	0.3367	2.3569	0.3367	0.505051	100
UAE_7837	0.96463	0.321543	1.28617	0	12.2186	9.6463	13.0225	33.9228	0.482315	15.7556	0	0	1.28617	0	0.160772	0.482315	0	0.643087	2.09003	3.37621	1.28617	3.05466	100
UAE_7886	0	0.149701	0.449102	0	22.4551	1.79641	1.49701	38.4731	0.299401	24.4012	0	0	0.748503	0.149701	0.748503	0	0	1.49701	0.898204	3.44311	0.149701	2.84431	100
UAE_7889SS	0	0	0.162602	0	20.6504	7.64228	1.30081	47.9675	0	9.9187	0	0.162602	2.43902	0	0.487805	0	0	0.325203	1.30081	4.71545	1.13821	1.78862	100
UAE_7890	0.334448	0	0.334448	0	28.0936	6.52174	1.17057	40.301	0	9.0301	0.334448	0.334448	2.67559	0	0.83612	0	0	0.334448	2.17391	3.34448	0.668896	3.51171	100
UAE_8513	0	0	12.275	0	23.4043	5.40098	5.56465	35.5155	0	8.18331	0	0.163666	1.14566	0	0.654664	0	0	0.163666	1.14566	3.60065	0.327332	2.45499	100
UAE_7936	0	0	0.16129	0	15.8065	3.54839	3.70968	24.1935	0.16129	7.41935	0.16129	0.483871	36.6129	0	0.483871	0	0	0.483871	0.483871	2.09677	0	4.19355	100
UAE_7937	0.161812	0	0.809061	0	9.2233	2.26537	5.17799	23.301	0.161812	19.2557	0	1.2945	26.8608	0	0.485437	0	0	0.161812	0.647249	2.75081	0.161812	7.28155	100
UAE_7983	0.15873	0	0.31746	0	51.9048	8.09524	0.31746	24.7619	0.15873	6.66667	0	0	1.11111	0	0.31746	0	0	0.15873	1.5873	2.69841	1.11111	0.634921	100
UAE_7911	0.166945	0	0.166945	0	35.2254	4.50751	1.16861	44.7412	0	4.67446	0	0	0.66778	0	0.500835	0	0.166945	0.500835	0.33389	5.84307	0.500835	0.834725	100
UAE_7912	0	0	0.151057	0	25.3776	4.83384	5.43807	40.3323	0.302115	7.0997	0.151057	0.302115	3.92749	0	1.0574	0	0	0.302115	0.151057	8.00604	0.302115	2.26586	100
UAE_7913	0	0	0.137552	0	20.2201	2.06327	3.989	32.0495	0.687758	23.7964	0	0.687758	3.30124	0	1.23796	0	0	0.687758	1.10041	3.02613	0.825309	6.18982	100
UAE_7920	0.621118	0	0	0	22.3602	7.14286	2.17391	36.8012	0.15528	11.1801	0.15528	0.621118	7.6087	0	1.08696	0	0	0.931677	0.465839	3.26087	0.15528	5.2795	100
UAE_7921	0.15456	0	0	0	30.9119	8.34621	1.08192	29.2117	0.309119	6.80062	0	0	18.0835	0	0.15456	0	0	0.463679	0.15456	2.62751	0.463679	1.23648	100
UAE_7922	0.141443	0	0.282885	0	34.3706	4.10184	5.37482	29.9859	0.282885	12.5884	0	0	6.64781	0	0.990099	0	0	0.424328	0.282885	1.13154	0.282885	3.11174	100
UAE_7924	0.473934	0	0	0	24.0126	4.58136	8.21485	25.1185	0.157978	11.6904	0.157978	0.157978	15.6398	0	0.631912	0	0	0.947867	0.473934	3.00158	0.157978	4.58136	100
UAE_7979	0	0.330033	0.990099	0	9.57096	4.78548	15.5116	36.4686	0	21.2871	0	0	1.15512	0	1.81518	0	0.165017	0.330033	0.825083	3.63036	0.660066	2.47525	100
UAE_7980	0.160256	0	0.160256	0	13.141	8.49359	11.0577	36.2179	0.160256	18.5897	0.160256	0.160256	1.28205	0	1.76282	0	0.160256	0.480769	0.961538	3.84615	0.160256	3.04487	100
UAE_8012	0.4329	0	4.7619	0	25.5411	19.9134	2.1645	19.0476	0	7.35931	0	0.4329	9.52381	0	1.7316	0	0	0	0	8.22511	0.4329	0.4329	100
UAE_8013	0	0	3.82979	0	29.3617	13.617	3.82979	16.1702	0	6.80851	0	0	14.4681	0	1.70213	0.851064	0	1.2766	0.851064	3.82979	0.425532	2.97872	100
UAE_8024	0	0.161031	2.0934	0	14.4928	7.24638	9.50081	41.868	0	14.6538	0	0	1.12721	0	1.93237	0	0	0.483092	0.483092	3.86473	0.161031	1.93237	100
UAE_7907	0.881057	0	0.440529	0	29.8091	3.96476	2.79001	46.1087	0.146843	7.1953	0	0	0.293686	0	1.0279	0	0	0.293686	0.881057	4.84581	0.440529	0.881057	100
UAE_7843	0	0.147493	0.589971	0	19.469	12.0944	1.17994	40.8555	0	8.25959	0.442478	0.589971	3.83481	0	0.737463	0	0	1.32743	0.884956	6.48968	1.32743	1.76991	100
UAE_7844	0	0	0.814332	0	21.0098	11.5635	0.977199	40.7166	0.162866	8.79479	0.162866	0.162866	5.04886	0	0.162866	0	0	0.651466	0.977199	6.84039	0.651466	1.30293	100
UAE_7848	0.600601	0.15015	1.05105	0	28.5285	8.25826	3.15315	33.9339	0	12.012	0.45045	0.15015	1.2012	0	0.15015	0	0	1.95195	0	7.50751	0	0.900901	100
UAE_7849a	0.455235	0.151745	2.88316	0	18.2094	11.3809	5.61457	33.6874	0.151745	15.1745	0.30349	0	3.18665	0	1.51745	0	0	0.151745	1.06222	3.64188	0.455235	1.97269	100
UAE_7853	0	0.163132	1.79445	0	13.54	15.3344	1.79445	36.3785	0.163132	16.3132	0.489396	0.489396	4.40457	0	0.652529	0	0	0.326264	0.489396	3.75204	0.489396	3.42577	100
UAE_7877	0	0.580552	1.45138	0	5.80552	17.1263	3.0479	34.9782	0.725689	21.045	0	0.145138	2.32221	0	2.03193	0.145138	0	0.725689	1.01597	3.62845	0.870827	4.35414	100
UAE_7887	0	0	0	0	17.9365	6.8254	1.74603	40.9524	0	17.9365	0	0.15873	0.952381	0	2.22222	0	0	0.31746	0.634921	4.92063	1.26984	4.12698	100
UAE_7977	0.162602	0	0.487805	0	15.4472	10.8943	4.87805	47.9675	0.162602	10.2439	0	0	0.813008	0	0.97561	0	0	0.650407	0.650407	4.39024	0.813008	1.46341	100
UAE_7985	0.647249	0	1.2945	0	16.9903	18.6084	4.20712	38.6731	0.323625	10.6796	0.161812	0	2.589	0	0.485437	0	0	0.485437	0.161812	3.55987	0.647249	0.485437	100
UAE_8010	0.161551	0	4.20032	0	24.2326	13.0856	4.68498	36.3489	0.323102	12.601	0.161551	0	0.807754	0	0.646204	0	0	0.161551	0.484653	0.969305	0.646204	0.484653	100
UAE_8011	0.325203	0	6.01626	0	30.0813	13.1707	5.85366	32.6829	0	7.15447	0	0	0.487805	0	0.813008	0	0	0.487805	0.325203	1.78862	0.162602	0.650407	100
UAE_8016	0.326264	0.163132	2.28385	0	26.7537	6.85155	5.54649	37.3573	0.326264	8.31974	0	0	1.79445	0	0.652529	0	0	0.163132	0.815661	3.75204	0	4.89396	100
UAE_8017	0.164745	0	2.14168	0	28.3361	6.09555	2.47117	38.056	0	10.8731	0	0.329489	0.658979	0	1.64745	0	0	0.658979	0.988468	4.44811	0.164745	2.9654	100
UAE_8020	0.312012	0	1.40406	0	31.8253	4.68019	2.34009	41.1856	0	8.11232	0	0.624025	0.312012	0	0.624025	0	0	0.780031	1.71607	1.40406	0.156006	4.52418	100
UAE_8023	0.163132	0	4.73083	0	16.1501	10.2773	4.73083	46.1664	0	11.4192	0	0	2.77325	0	0.163132	0	0	1.14192	0.326264	1.63132	0.163132	0.163132	100
UAE_7902	0.159744	0.159744	3.51438	0	23.0032	11.1821	5.27157	41.853	0.319489	6.07029	0	0.159744	1.75719	0	0.319489	0	0	0.638978	0.479233	3.51438	0.638978	0.958466	100
UAE_7904	0	0.163666	1.63666	0	20.9493	14.239	4.09165	48.9362	0	5.56465	0	0.327332	0.490998	0.163666	0.818331	0	0	0.327332	0	1.14566	0	1.14566	100
UAE_7908	0.468019	0.156006	2.96412	0	23.5569	7.17629	4.9922	39.7816	0	9.9844	0	0	3.12012	0	0.468019	0	0.156006	0.312012	0.312012	4.52418	0.156006	1.87207	100
UAE_7914	0.165289	0	0.661157	0	27.9339	8.26446	4.13223	39.3388	0	8.59504	0.165289	0.495868	1.65289	0	1.65289	0	0	0.165289	0.991736	3.47107	0.826446	1.4876	100
UAE_8511	0	0	3.71567	0	14.378	1.77706	8.40065	42.4879	0.161551	18.9015	0	0	0.646204	0	1.61551	0	0	0.969305	0.161551	2.26171	0	4.52342	100
UAE_8512	0	0	2.71186	0	18.8136	5.9322	7.62712	36.9492	0.169492	18.3051	0	0	2.20339	0	2.0339	0	0	0.508475	0.338983	1.69492	0.338983	2.37288	100
UAE_8515	0.15949	0	1.11643	0	17.7033	7.81499	10.2073	40.1914	0.478469	13.2376	0	0.637959	0.797448	0	2.23285	0	0	0.797448	0	3.0303	0	1.5949	100
UAE_7929	0	0.318471	0.159236	0	17.1975	9.07643	6.6879	38.3758	0.318471	13.2166	0.159236	0.477707	4.77707	0.159236	1.27389	0	0	0.477707	0.955414	2.70701	0.636943	3.02548	100
UAE_7935	0	0	0	0.155521	23.9502	6.6874	9.79782	35.4588	0	5.9098	0.155521	0.466563	5.44323	0.311042	0.777605	0	0	0.155521	0.155521	8.08709	0.933126	1.55521	100
UAE_7933	0	0.13947	0	0	12.5523	3.20781	7.67085	49.0934	0.41841	13.1102	0	0	0.55788	0	3.06834	0	0	0.97629	3.62622	3.48675	0.55788	1.53417	100
UAE_7934	0	0.318979	0.15949	0	18.6603	0.956938	3.34928	50.5582	0.15949	16.4274	0.15949	0	0.15949	0	1.5949	0	0	1.27592	0.797448	2.39234	0.797448	2.23285	100
UAE_8036	0	0.331126	1.3245	0	44.8675	1.3245	1.3245	29.6358	0	12.2517	0	0.662252	0	0	1.3245	0	0	0.165563	1.3245	1.82119	0.827815	2.81457	100
UAE_8037	0	0	1.48026	0	40.2961	2.79605	3.45395	25.8224	0	15.625	0	0	0.164474	0	0.822368	0	0.164474	0.328947	0.986842	1.48026	0	6.57895	100
UAE_8042	0	0	0.15625	0	44.8438	7.96875	1.09375	29.0625	0	9.21875	0.15625	0	0.46875	0	0.9375	0	0	0.15625	0.625	2.65625	0.3125	2.34375	100
UAE_8043	0	0	0.15748	0	46.9291	6.77165	0.787402	22.3622	0.15748	11.0236	0	0.15748	1.25984	0	1.25984	0	0	0.472441	0.15748	4.56693	0.472441	3.46457	100
UAE_7854	0	0	0.333333	0	50.6667	7	0.166667	24.8333	0	4.83333	0.166667	0.666667	4.33333	0	0.333333	0.166667	0	0.333333	0.833333	2.16667	0.666667	2.5	100
UAE_7855	0	0.337268	1.18044	0	23.6088	11.2985	0.674536	29.3423	0	11.4671	0.168634	0.674536	2.69815	0	0.674536	0	0	0.505902	6.23946	7.9258	0.505902	2.69815	100
UAE_7856	0	0	2.57235	0	28.2958	6.91318	0.803859	23.4727	0	20.2572	0.482315	0.643087	3.69775	0	0.482315	0	0	0.321543	1.44695	4.82315	1.44695	4.34084	100
UAE_7857	0	0.158479	2.53566	0	29.9525	6.18067	0.158479	29.6355	0.158479	13.7876	0	0.158479	2.85261	0.158479	1.74326	0	0	0.475436	1.26783	4.59588	1.42631	4.75436	100
UAE_7873	0	0.322061	0.805153	0.161031	15.1369	6.44122	1.12721	38.0032	0.322061	15.942	0	0	4.99195	0.161031	2.25443	0.161031	0	0.644122	2.57649	2.89855	1.44928	6.60225	100
UAE_7876	0.318471	0	0	0	29.6178	4.93631	0	35.5096	0.159236	12.4204	0	0.159236	2.54777	0	1.59236	0	0	0.477707	1.11465	1.59236	1.43312	8.12102	100
UAE_7892	0	0.165563	0.496689	0	36.9205	4.80132	0.496689	35.9272	0.331126	8.11258	0	0.331126	1.15894	0	0.496689	0	0	0.165563	1.15894	5.46358	1.3245	2.64901	100
UAE_7898	0	0	0	0	52.9412	2.01681	0.840336	25.2101	0	8.57143	0	0.840336	2.52101	0	0.840336	0	0.168067	0.336134	0.504202	2.18487	0.168067	2.85714	100
UAE_7917	0	0	0.318471	0	27.707	5.89172	6.84713	34.0764	0.159236	13.0573	0.159236	0.318471	2.38854	0	1.43312	0	0	0.796178	0.636943	2.38854	0.796178	3.02548	100
UAE_7918	0	0	0	0	30.4482	5.7187	3.70943	35.8578	0.15456	13.4467	0.463679	0	1.70015	0	1.39104	0	0	0.15456	1.08192	2.16383	0.463679	3.24575	100
UAE_7919	0.162338	0	0	0	36.8506	6.49351	2.5974	34.9026	0.162338	11.039	0	0	2.27273	0	0.324675	0	0.162338	0.324675	0.649351	2.27273	0.974026	0.811688	100
UAE_8035	0	0	0.15949	0	42.1053	2.39234	0.797448	24.7209	0	11.9617	0	0.15949	1.11643	0	0.637959	0	0	0.637959	0.956938	2.23285	0.318979	11.8022	100
UAE_8034	0.44843	0.149477	0	0	52.4664	1.19581	1.04634	24.9626	0.44843	7.7728	0	0.44843	1.19581	0	0.896861	0	0	0.747384	1.49477	1.04634	0.298954	5.38117	100
